# Supplementary material for: Comparison of the biological effects of gadodiamide (Omniscan) and gadoteridol (ProHance) by means of multi-organ and plasma metabolomics
Source: Royal Society of Chemistry journal article supplement (doi:10.1039/d3an00353a), 2023-01-01
Supplement: d3an00353a1.pdf [file d3an00353a1.pdf]

## Electronic Supporting Information

### **Comparison of the biological effects of Gadodiamide (Omniscan) and Gadoteridol (ProHance) by means of multi-organ and plasma metabolomics**

*Francesca Romano<sup>a§</sup>, Enza Di Gregorio<sup>b§</sup>, Gelsomina Riccardi<sup>a§</sup>, Chiara Furlan<sup>b</sup>, Nicola Cavallini<sup>c</sup>, Francesco Savorani<sup>c</sup>, Anna Di Porzio<sup>a</sup>, Stefano De Tito<sup>d</sup>, Antonio Randazzo<sup>a</sup>, Eliana Gianolio<sup>b\*</sup>, and Nunzia Iaccarino<sup>a\*</sup>*

<sup>a</sup> Department of Pharmacy, University of Naples Federico II, Naples, 80131, Italy

<sup>b</sup> Department of Molecular Biotechnologies and Health Science, University of Turin, Turin, 10126, Italy

<sup>c</sup> Department of Applied Science and Technology, Politecnico di Torino, Turin, 10129, Italy

<sup>d</sup> Molecular Cell Biology of Autophagy Laboratory, The Francis Crick Institute, London, NW1 1AT, United Kingdom

## Table of Contents

|    | Content                                                                                                                                                                                                                                                                                                                                                                                                                                                                                                                                                                                                                                       | Page |
|----|-----------------------------------------------------------------------------------------------------------------------------------------------------------------------------------------------------------------------------------------------------------------------------------------------------------------------------------------------------------------------------------------------------------------------------------------------------------------------------------------------------------------------------------------------------------------------------------------------------------------------------------------------|------|
| 1  | <b>Figure S1.</b> List of resolved intervals from 1D NOESY <sup>1</sup> H-NMR spectra. The left panels represent the raw superimposed spectra for each selected interval while the right panel reports the spectral profiles obtained by the MCR model. PC1-3 stand for Principal Component 1-3 and they are referred to the actual MCR-resolved components which were identified as meaningful chemical signals in each individual model.                                                                                                                                                                                                    | 2    |
| 2  | <b>Figure S2.</b> List of resolved intervals from CPMG <sup>1</sup> H-NMR spectra. The left panels represent the raw superimposed spectra for each selected interval while the right panel reports the spectral profiles obtained by the MCR model. PC1-3 stand for Principal Component 1-3 and they are referred to the actual MCR-resolved components which were identified as meaningful chemical signals in each individual model.                                                                                                                                                                                                        | 5    |
| 3  | <b>Figure S3.</b> 1D NOESY spectrum of a representative control sample along with the signal assignment. Keys: Lipid 1 and Lipid 2: -CH=CH-; Glyceril lipid 1: =CH-OCOR; Glyceril lipid 2: -CH <sub>2</sub> OCOR; Glycerophosphocholine: -CH <sub>2</sub> OH; Phosphatidylcholine 1, Phosphatidylcholine 2 and Phosphatidylcholine 3: -N(CH <sub>3</sub> ) <sub>3</sub> ; Lipid 3, Lipid 4 and Lipid 5: -CH=CH-CH <sub>2</sub> -CH=CH-; Lipid 6: -CH <sub>2</sub> CO-; Lipid 7: -CH <sub>2</sub> C=C-; Lipid 8: -CH <sub>2</sub> CH <sub>2</sub> CO-; VLDL 1 and LDL 1: (CH <sub>2</sub> ) <sub>n</sub> ; VLDL 2 and LDL 2: CH <sub>3</sub> . | 10   |
| 4  | <b>Figure S4.</b> Representative GC-MS chromatograms obtained from the analysis of the aqueous extracts of (A) liver, (B) kidney, (C) spleen, (D) brain and (E) cerebellum.                                                                                                                                                                                                                                                                                                                                                                                                                                                                   | 11   |
| 5  | <b>Figure S5.</b> PC2/PC6 scores (left) and loadings (right) plots of the PCA model calculated using the MCR integrated peaks of the 1H NMR NOESY and CPMG spectra of plasma. Keys: L1-8: lipid 1-8; GPC: glycerophosphocholine; GL1-2: Glyceril lipid 1-2; PC1-3: Phosphatidylcholine 1-3; VLDL_1 and VLDL_2: very low-density lipoprotein; LDL_1 and LDL_2: low-density lipoprotein.                                                                                                                                                                                                                                                        | 13   |
| 6  | <b>Figure S6.</b> (A) PC1 vs. PC2 scores and (B) loadings plots of the PCA model calculated using the MCR integrated peaks of the 1D NOESY and CPMG spectra of plasma. Keys: L1-8: lipid 1-8; GPC: glycerophosphocholine; GL1-2: Glyceril lipid 1-2; PC1-3: Phosphatidylcholine 1-3; VLDL_1 and VLDL_2: very low-density lipoprotein; LDL_1 and LDL_2: low-density lipoprotein.                                                                                                                                                                                                                                                               | 13   |
| 7  | <b>Table S1.</b> Average amounts of fresh tissues and buffer employed for sample homogenization.                                                                                                                                                                                                                                                                                                                                                                                                                                                                                                                                              | 14   |
| 8  | <b>Table S2.</b> Amount of aqueous extract and TMSCN employed for GC-MS analysis.                                                                                                                                                                                                                                                                                                                                                                                                                                                                                                                                                             | 14   |
| 9  | <b>Table S3.</b> List of all metabolites identified in liver, kidney, spleen, brain and cerebellum aqueous extracts by GC-MS analysis. Full name, short name, RT, RI, RI(NIST), ΔRI, ID level, CAS registry number and <i>p</i> -value from one-way ANOVA are indicated for each compound.                                                                                                                                                                                                                                                                                                                                                    | 15   |
| 10 | <b>Table S4.</b> List of non-polar and polar compounds detected in plasma by using both NOESY and CPMG <sup>1</sup> H-NMR experiments. Short name and <i>p</i> -value from one-way ANOVA are indicated for each compound. ANOVA was performed on the three analyzed class.                                                                                                                                                                                                                                                                                                                                                                    | 18   |

Key:

Resolved component 1 = blue profile

Resolved component 2 = red profile

Resolved component 3 = yellow profile

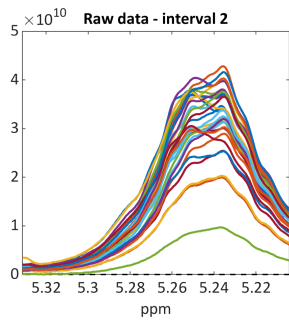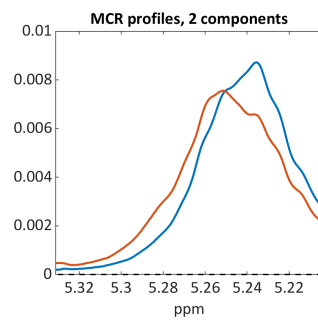

Interval assignment:  
Methine (CH) of unsaturated lipids

comp.1: lipid 1  
comp.2: lipid 2

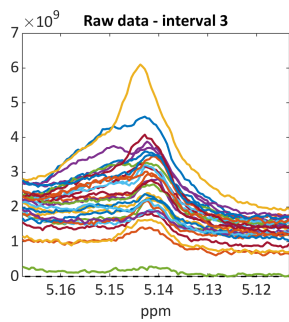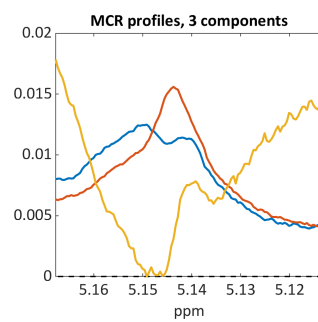

Interval assignment:  
Methine (CHOCOR) of glyceryl lipids

comp.1 + comp.2: glyceril lipid 1

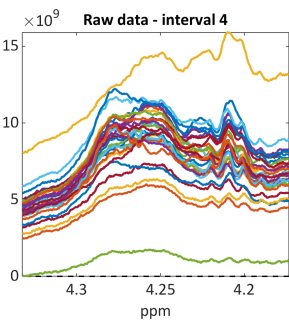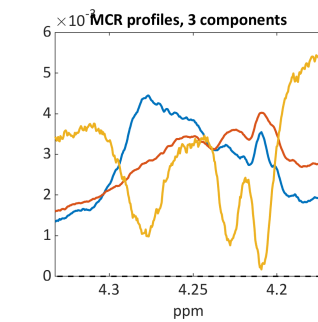

Interval assignment:  
Methylene (CH<sub>2</sub>OCOR) of glyceryl lipids  
and methylene (CH<sub>2</sub>OH) of choline

comp.1: glyceril lipid 2  
comp.2: glycerophosphocholine

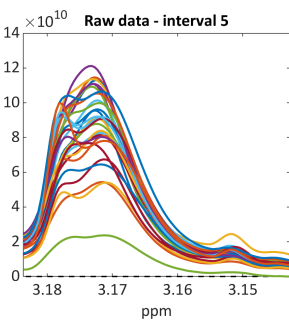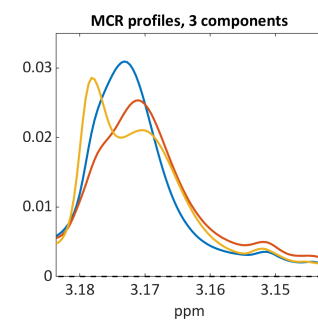

Interval assignment:  
N(CH<sub>3</sub>)<sub>3</sub> Choline

comp.1: phosphatidylcholine 1  
comp.2: phosphatidylcholine 2  
comp.3: phosphatidylcholine 3

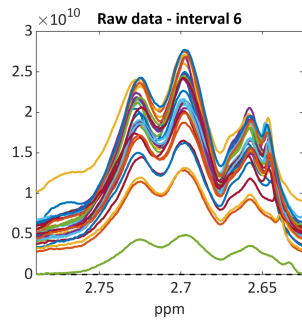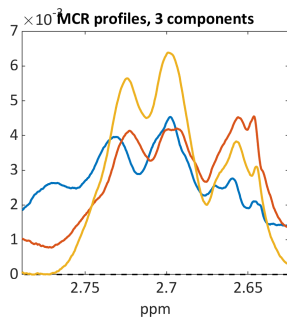

Interval assignment:  
CH=CH-CH<sub>2</sub>-CH=CH of lipids

- comp.1: Lipid 3
- comp.2: Lipid 4
- comp.3: Lipid 5

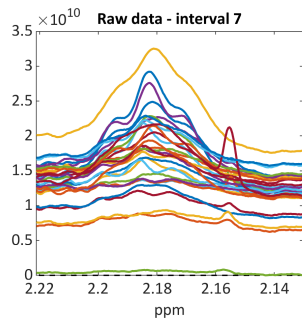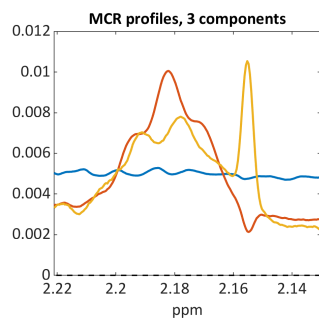

Interval assignment:  
CH<sub>2</sub>CO of lipids

- comp.2: lipid 6

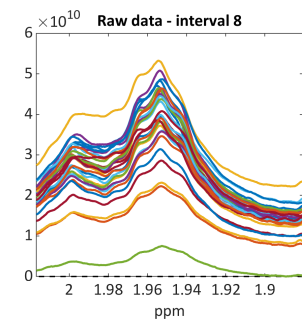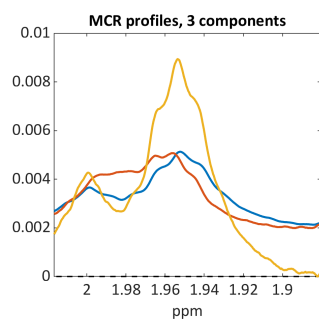

Interval assignment:  
CH<sub>2</sub>C=C of lipids

- comp.1: lipid 7

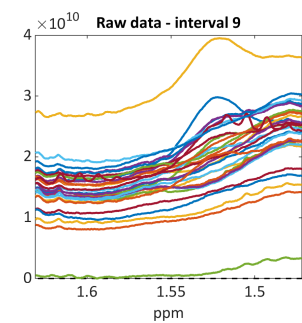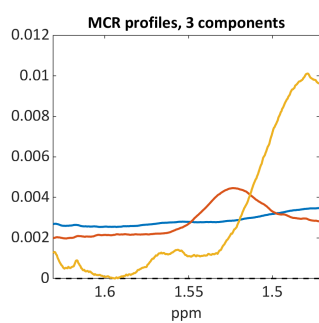

Interval assignment:  
CH<sub>2</sub>CH<sub>2</sub>CO of lipids

- comp.2: lipid 8

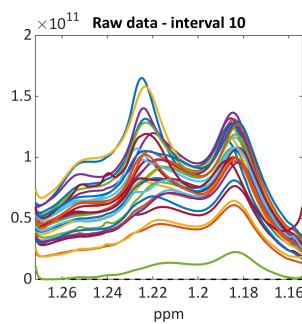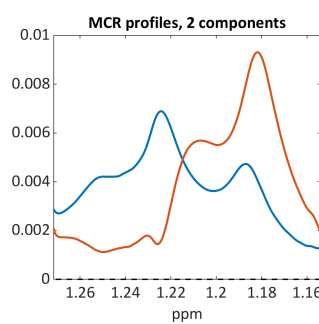

Interval assignment:  
(CH<sub>2</sub>)<sub>n</sub> of lipids

- comp.1: VLDL\_1
- comp.2: LDL\_1

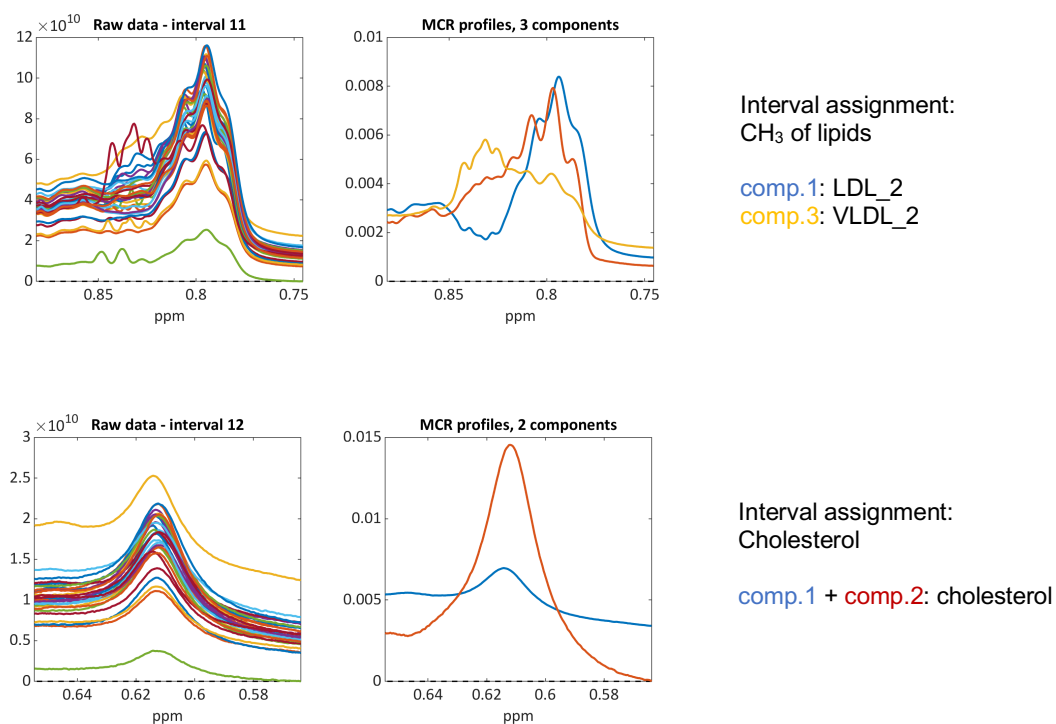

**Figure S1.** List of resolved intervals from NOESY <sup>1</sup>H-NMR spectra. The left panels represent the raw superimposed spectra for each selected interval while the right panel reports the spectral profiles obtained by the MCR model. PC1-3 stand for Principal Component 1-3 and they are referred to the actual MCR-resolved components which were identified as meaningful chemical signals in each individual model.

Key:

Resolved component 1 = blue profile

Resolved component 2 = red profile

Resolved component 3 = yellow profile

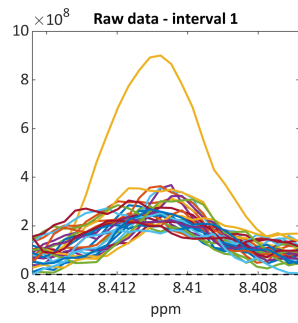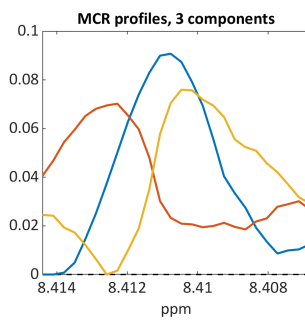

Interval assignment:  
Formate

comp.1: Formate

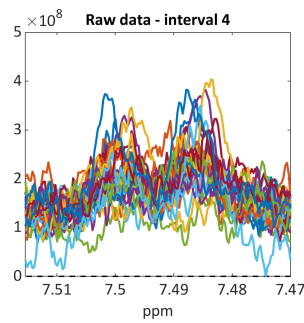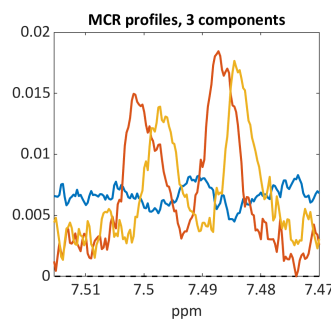

Interval assignment:  
Tryptophan

comp.2 + comp.3: Tryptophan

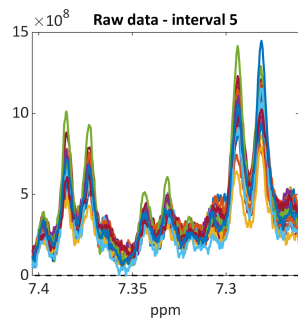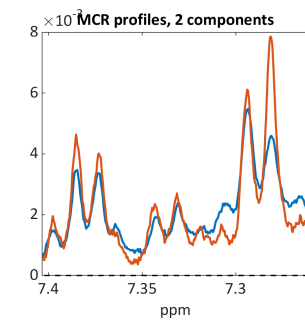

Interval assignment:  
Phenylalanine

comp.1 + comp.2: Phenylalanine

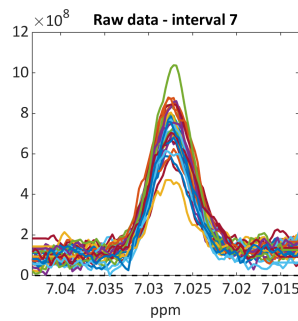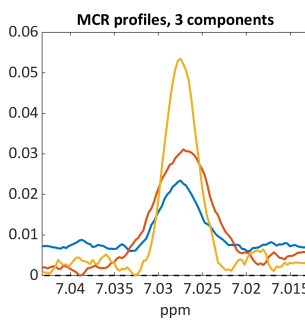

Interval assignment:  
Histidine

comp.2 + comp.3: Histidine

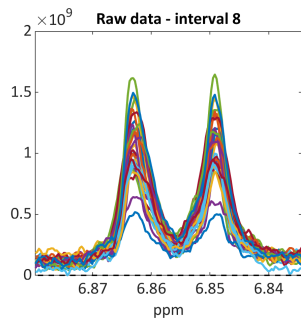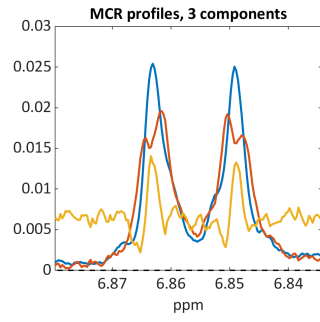

Interval assignment:  
Tyrosine

comp.2 + comp.3: Tyrosine

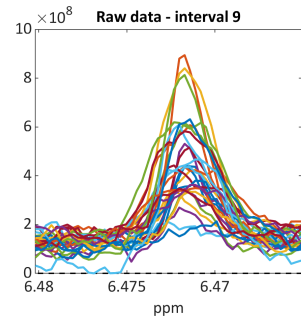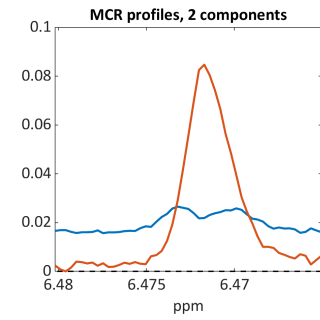

Interval assignment:  
Fumarate

comp.2: Fumarate

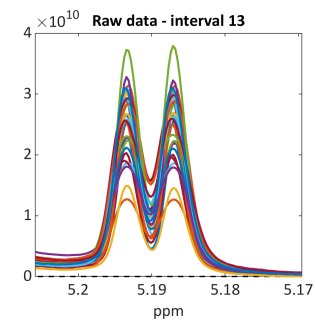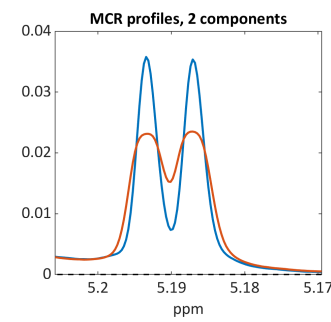

Interval assignment:  
Glucose

comp.1 + comp.2: Glucose

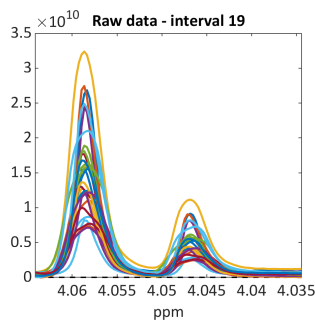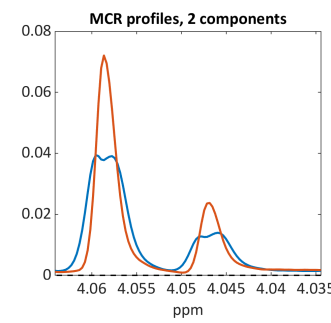

Interval assignment:  
Lactate

comp.1 + comp.2: Lactate

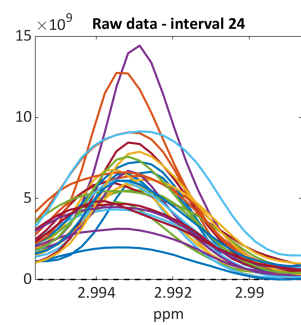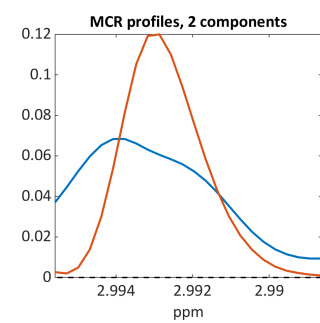

Interval assignment:  
Creatine

comp.2: Creatine

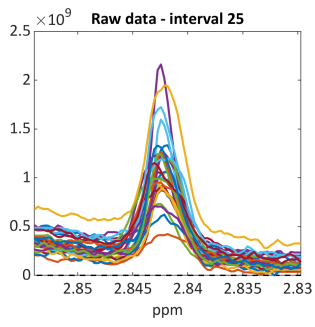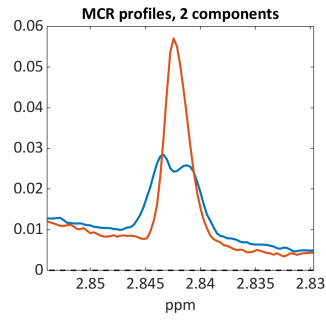

Interval assignment:  
N,N-Dimethylglycine

comp.1 + comp.2: N,N-Dimethylglycine

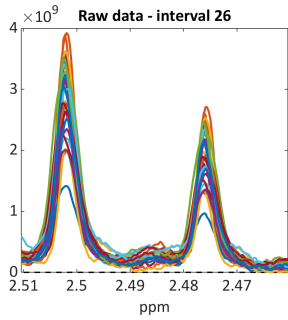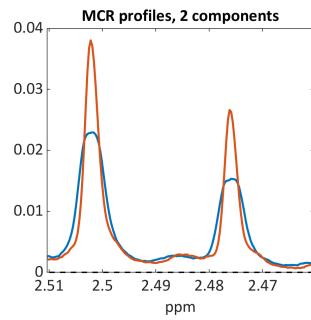

Interval assignment:  
Citrate

comp.1 + comp.2: Citrate

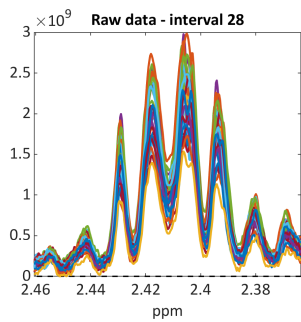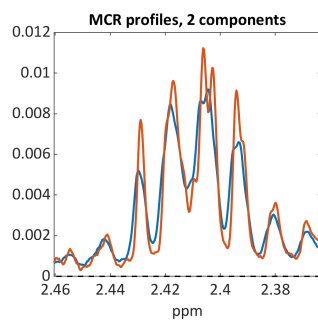

Interval assignment:  
Glutamine

comp.1 + comp.2: Glutamine

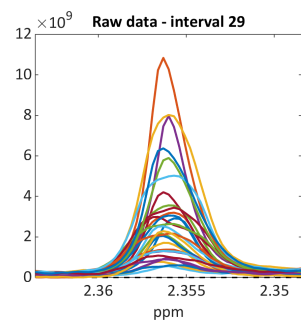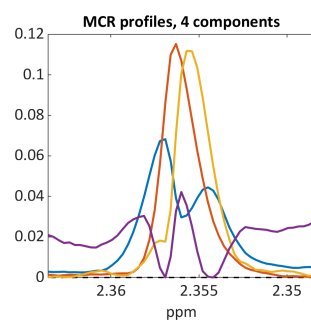

Interval assignment:  
Succinate

comp.2 + comp.3: Succinate

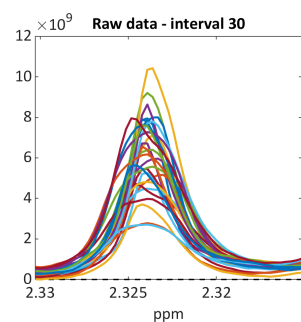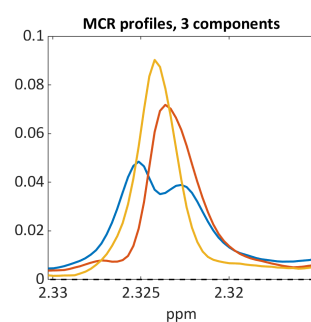

Interval assignment:  
Pyruvate

comp.2 and comp.3: Pyruvate



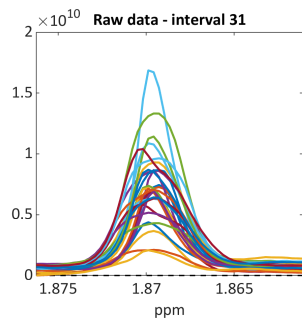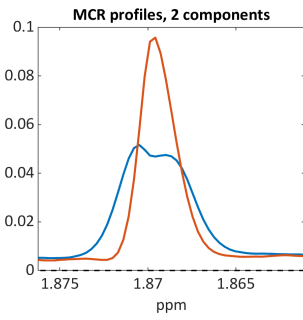

Interval assignment:  
Acetate

comp.2: Acetate

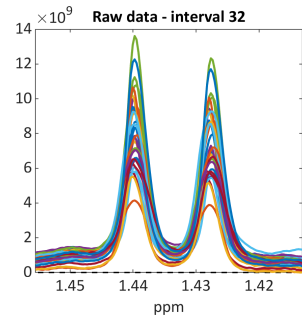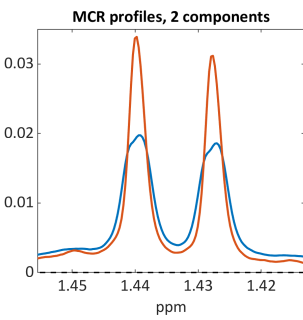

Interval assignment:  
Alanine

comp.1 + comp.2: Alanine

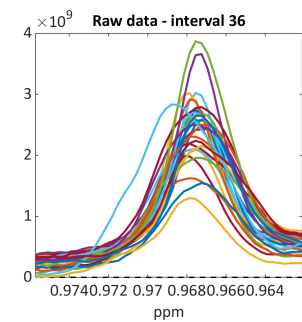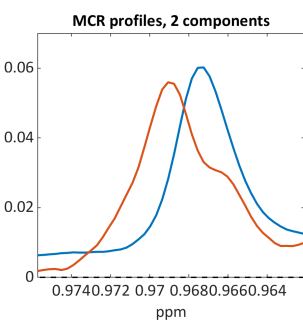

Interval assignment:  
Isoleucine

comp.1: Isoleucine

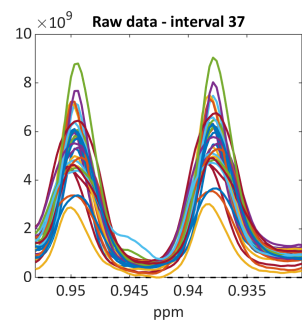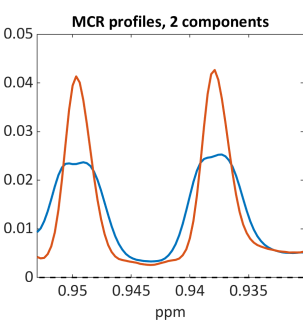

Interval assignment:  
Valine

comp.1 + comp.2: Valine

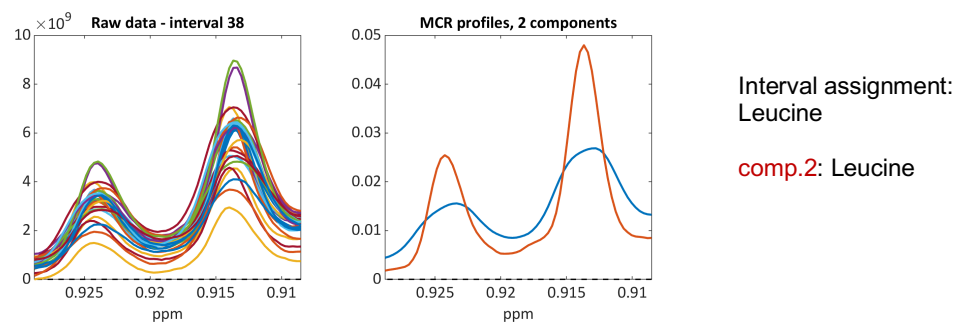

**Figure S2.** List of resolved intervals from CPMG  $^1\text{H}$ -NMR spectra. The left panels represent the raw superimposed spectra for each selected interval while the right panel reports the spectral profiles obtained by the MCR model. Comp. 1-3 stand for component 1-3 and they are referred to the actual MCR-resolved components which were identified as meaningful chemical signals in each individual model.

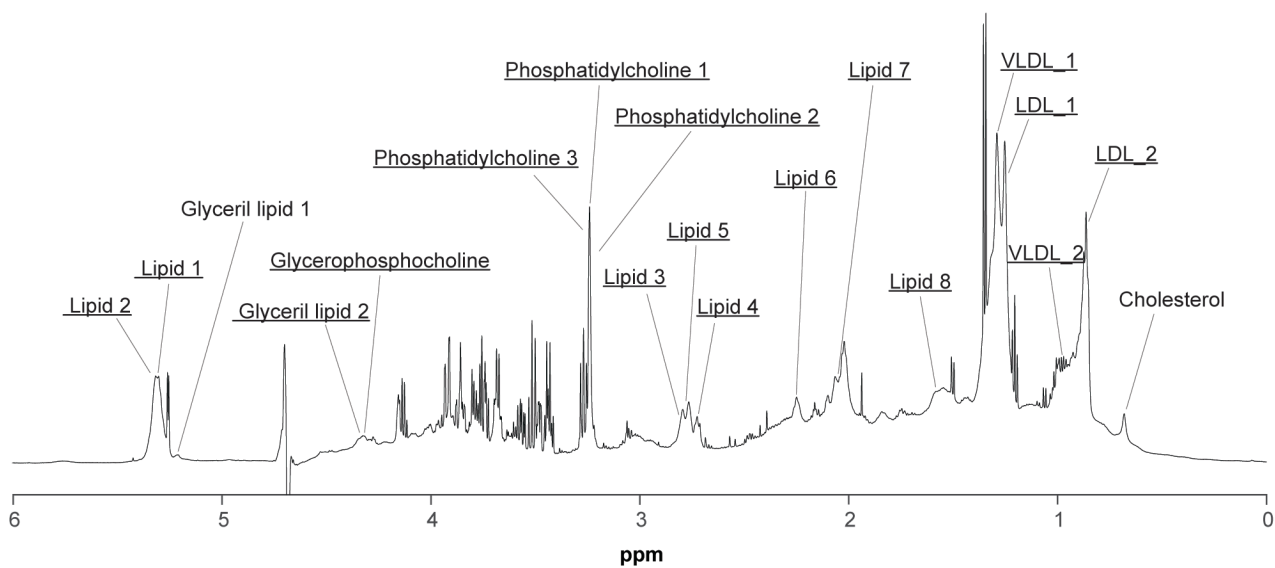

**Figure S3.** 1D NOESY spectrum of a representative control sample along with the signal assignment. Keys: Lipid 1 and Lipid 2:  $-\text{CH}=\text{CH}-$ ; Glyceril lipid 1:  $=\text{CH}-\text{OCOR}$ ; Glyceril lipid 2:  $-\text{CH}_2\text{OCOR}$ ; Glycerophosphocholine:  $-\text{CH}_2\text{OH}$ ; Phosphatidylcholine 1, Phosphatidylcholine 2 and Phosphatidylcholine 3:  $-\text{N}(\text{CH}_3)_3$ ; Lipid 3, Lipid 4 and Lipid 5:  $-\text{CH}=\text{CH}-\text{CH}_2-\text{CH}=\text{CH}-$ ; Lipid 6:  $-\text{CH}_2\text{CO}-$ ; Lipid 7:  $-\text{CH}_2\text{C}=\text{C}-$ ; Lipid 8:  $-\text{CH}_2\text{CH}_2\text{CO}-$ ; VLDL\_1 and LDL\_1:  $(\text{CH}_2)_n$ ; VLDL\_2 and LDL\_2:  $\text{CH}_3$ .

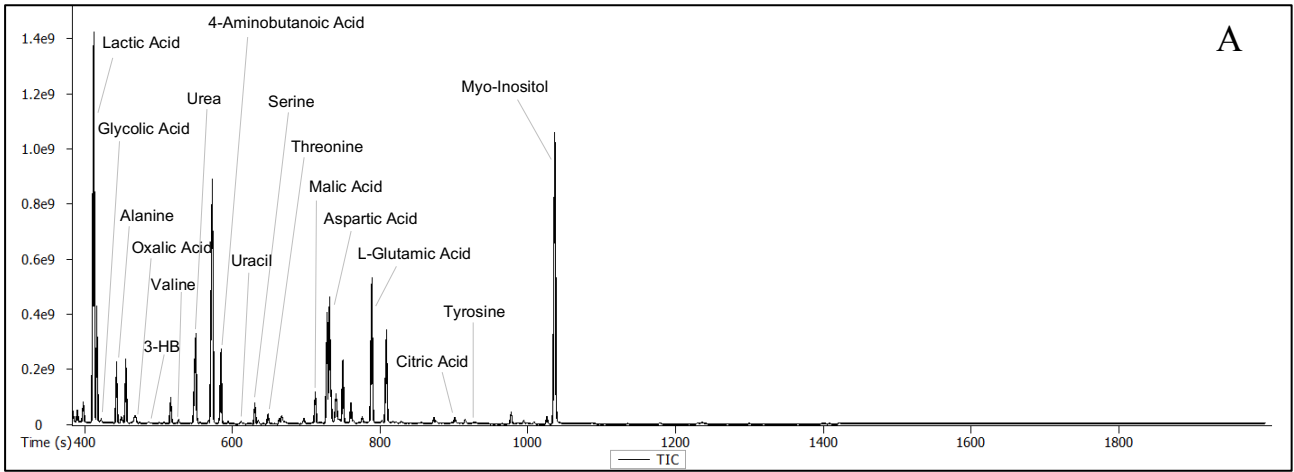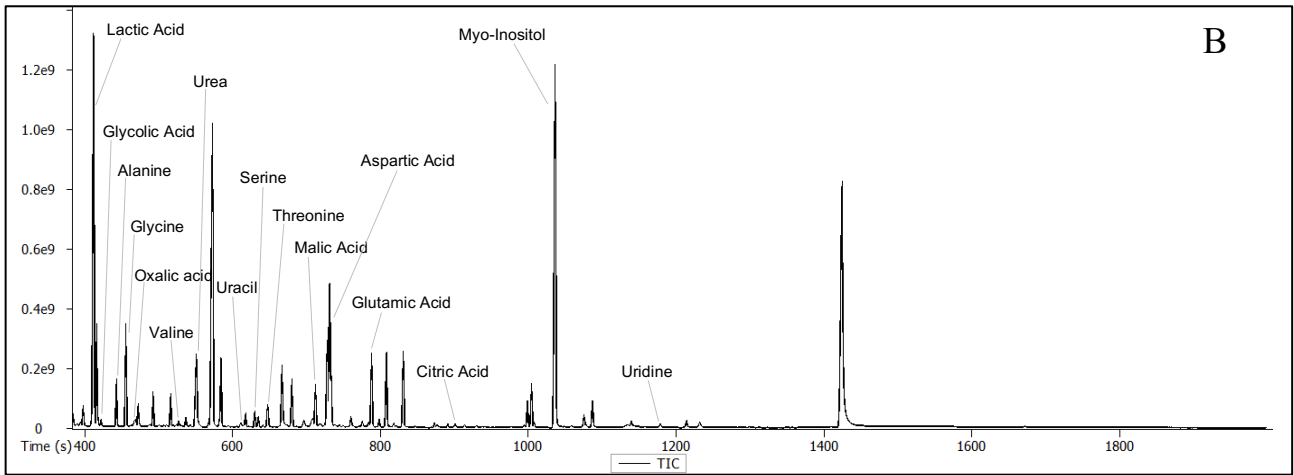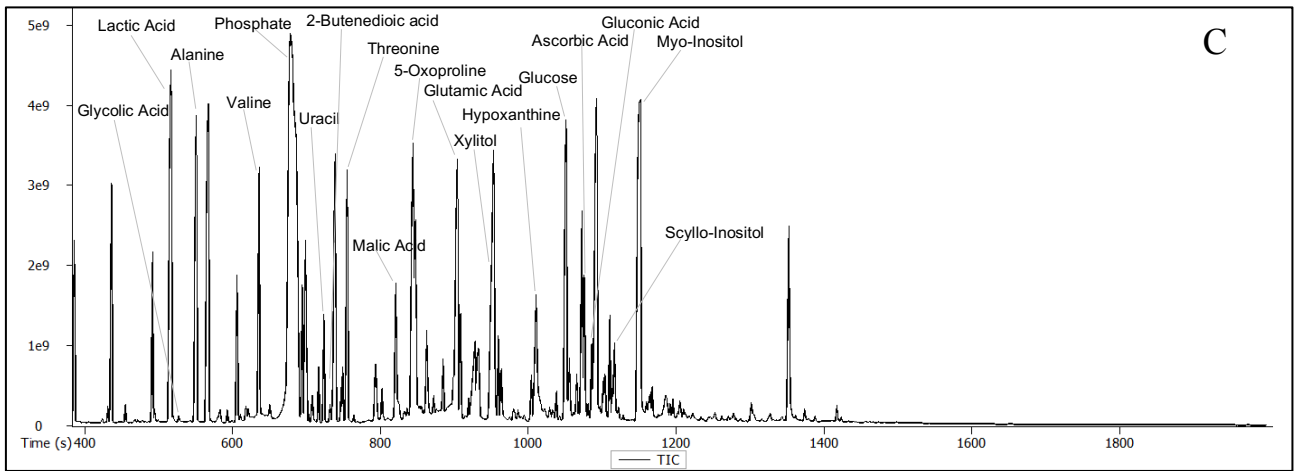

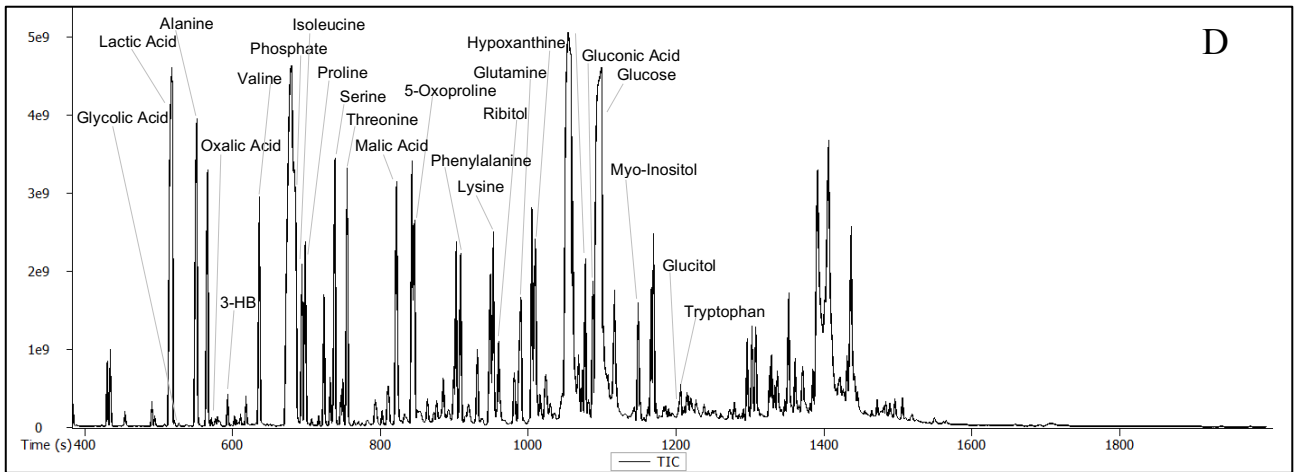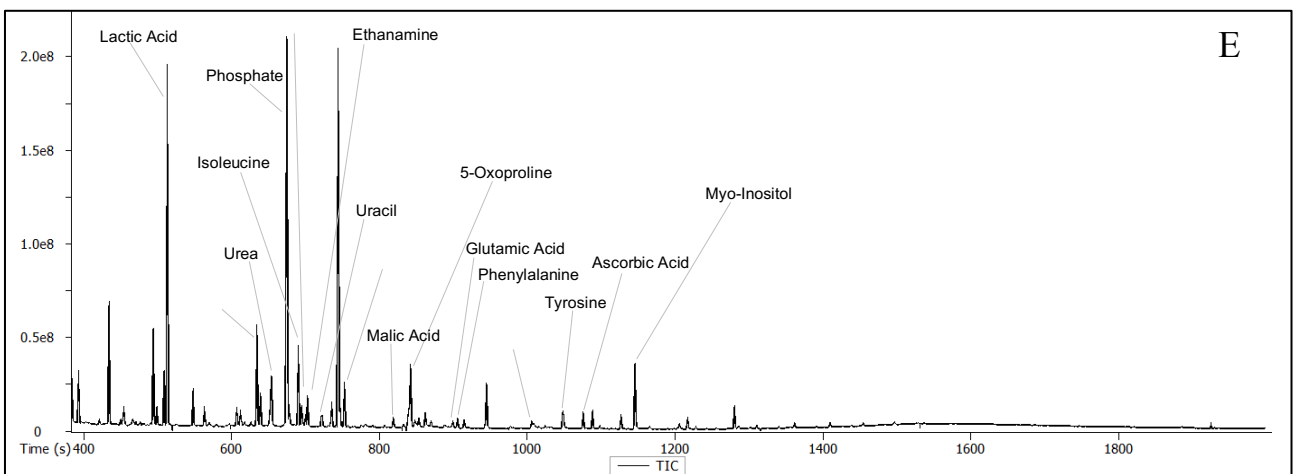

**Figure S4.** Representative GC-MS chromatograms along with the peak assignment. Chromatograms were obtained from the analysis of the aqueous extracts of (A) brain, (B) cerebellum, (C) kidney, (D) liver and (E) spleen.

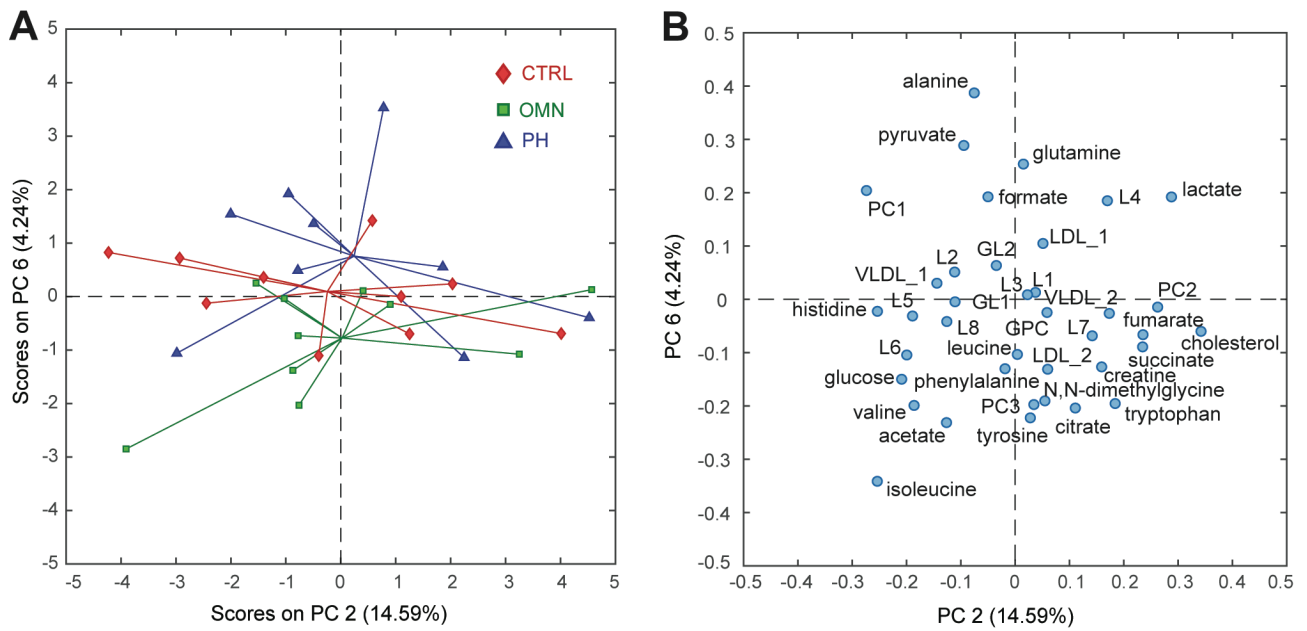

**Figure S5.** (A) PC 2/PC 6 scores and (B) loadings plots of the PCA model calculated using the MCR integrated peaks of the  $^1\text{H}$  NMR NOESY and CPMG spectra of plasma. Keys: L1-8: lipid 1-8; GPC: glycerophosphocholine; GL1-2: Glyceril lipid 1-2; PC1-3: Phosphatidylcholine 1-3; VLDL\_1 and VLDL\_2: very low density lipoprotein; LDL\_1 and LDL\_2: low density lipoprotein.

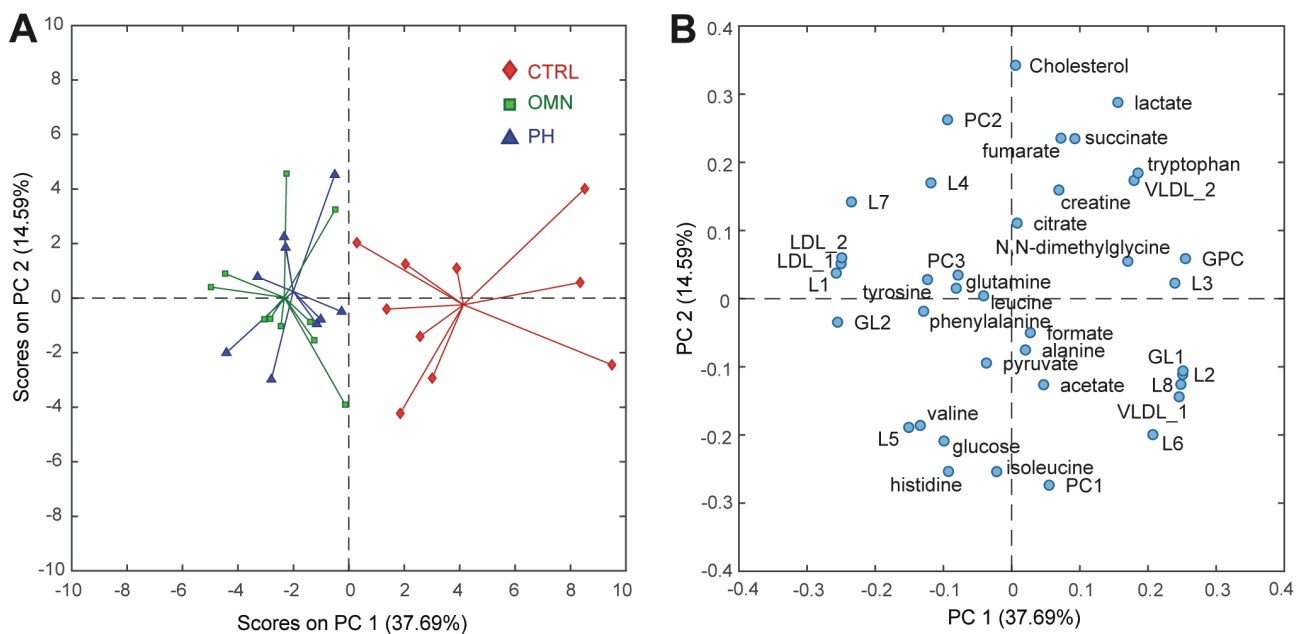

**Figure S6.** (A) PC1 vs. PC2 scores and (B) loadings plots of the PCA model calculated using the MCR integrated peaks of the 1D NOESY and CPMG spectra of plasma. Keys: L1-8: lipid 1-8; GPC: glycerophosphocholine; GL1-2: Glyceril lipid 1-2; PC1-3: Phosphatidylcholine 1-3; VLDL\_1 and VLDL\_2: very low-density lipoprotein; LDL\_1 and LDL\_2: low-density lipoprotein.

**Table S1.** Average amounts of fresh tissues and buffer employed for sample homogenization.

| <b>Organ</b> | <b>Average weight of the fresh tissue (g)±SD</b> | <b>Buffer (μL)</b> |
|--------------|--------------------------------------------------|--------------------|
| Liver        | 1.20±0.11                                        | 1000               |
| Kidney       | 0.41±0.03                                        | 400                |
| Spleen       | 0.14±0.03                                        | 200                |
| Brain        | 0.28±0.04                                        | 300                |
| Cerebellum   | 0.12±0.01                                        | 200                |

**Table S2.** Amount of aqueous extract and TMSCN employed for GC-MS analysis.

| <b>Organ</b> | <b>Aqueous extract (μL)</b> | <b>TMSCN (μL)</b> |
|--------------|-----------------------------|-------------------|
| Liver        | 60                          | 60                |
| Kidney       | 60                          | 60                |
| Spleen       | 80                          | 80                |
| Brain        | 60                          | 60                |
| Cerebellum   | 60                          | 60                |

**Table S3.** List of all metabolites identified in organs extracts by GC-MS. Full name, short name, RT, RI, RI(NIST),  $\Delta$ RI, ID level, CAS registry number and *p*-value from one-way ANOVA are indicated for each compound.

| ID #              | ID #<br>general | Metabolite full name from NIST <sup>a</sup> | Metabolite short name <sup>b</sup> | RT (s) <sup>c</sup> | RI <sup>d</sup> | RI (NIST) <sup>e</sup> | $\Delta$ RI <sup>f</sup> | ID <sup>g</sup> | CAS <sup>h</sup> | One-way ANOVA <sup>i</sup> |                           |                             |
|-------------------|-----------------|---------------------------------------------|------------------------------------|---------------------|-----------------|------------------------|--------------------------|-----------------|------------------|----------------------------|---------------------------|-----------------------------|
|                   |                 |                                             |                                    |                     |                 |                        |                          |                 |                  | Untreated-<br>Gadodiamide  | Untreated-<br>Gadoteridol | Gadodiamide-<br>Gadoteridol |
| <b>Brain</b>      |                 |                                             |                                    |                     |                 |                        |                          |                 |                  |                            |                           |                             |
| 1                 | 1               | Lactic Acid, 2TMS derivative                | Lactic Acid, 2TMS                  | 412                 | 1057.4          | 1066                   | -8.6                     | 2               | 17596-96-2       | N.S.                       | N.S.                      | N.S.                        |
| 2                 | 2               | Glycolic acid, 2TMS derivative              | Glycolic acid, 2TMS                | 422.3               | 1072.4          | 1081                   | -8.6                     | 2               | 33581-77-0       | N.S.                       | N.S.                      | N.S.                        |
| 3                 | 3               | L-Alanine, 2TMS derivative                  | Alanine, 2TMS                      | 443                 | 1102.7          | 1100                   | 2.7                      | 2               | 27844-07-1       | N.S.                       | N.S.                      | N.S.                        |
| 4                 | 4               | Oxalic acid, 2TMS derivative                | Oxalic acid, 2TMS                  | 467.3               | 1138.2          | 1136                   | 2.2                      | 2               | 18294-04-7       | N.S.                       | N.S.                      | N.S.                        |
| 5                 | 5               | Hydracrylic acid, 2TMS derivative           | $\beta$ -Lactic acid, bis-TMS      | 474.1               | 1148.1          | 1151                   | -2.9                     | 2               | 55162-32-8       | N.S.                       | N.S.                      | N.S.                        |
| 6                 | 6               | 3-Hydroxybutyric acid, 2TMS derivative      | 3-Hydroxybutyric acid, 2TMS        | 486.7               | 1166.5          | 1167                   | -0.5                     | 2               | 55133-94-3       | 6.20E-03                   | N.S.                      | N.S.                        |
| 7                 | 7               | L-Valine, 2TMS derivative                   | Valine, 2TMS                       | 527.3               | 1225.9          | 1224                   | 1.9                      | 2               | 7364-44-5        | N.S.                       | N.S.                      | N.S.                        |
| 8                 | 8               | Urea, 2TMS derivative                       | Urea, 2TMS                         | 544.3               | 1250.7          | 1249                   | 1.7                      | 2               | 18297-63-7       | N.S.                       | N.S.                      | 926E-04                     |
| 9                 | 9               | Ethanolamine, 3TMS derivative               | Ethanolamine, 3TMS                 | 562.3               | 1277.0          | 1262                   | 15.0                     | 2               | 5630-81-9        | N.S.                       | N.S.                      | N.S.                        |
| 10                | 10              | L-Leucine, 2TMS derivative                  | Leucine, 2TMS                      | 567.5               | 1284.6          | 1276                   | 8.6                      | 2               | 7364-46-7        | N.S.                       | N.S.                      | N.S.                        |
| 11                | 11              | 4-Aminobutanoic acid, 2TMS derivative       | 4-Aminobutyric acid, bis-TMS       | 584.1               | 1308.9          | 1308                   | 0.9                      | 2               | 39538-11-9       | N.S.                       | N.S.                      | N.S.                        |
| 12                | 12              | Glycine, 3TMS derivative                    | Glycine, 3TMS                      | 584.2               | 1309.0          | 1314                   | -5.0                     | 2               | 5630-82-0        | N.S.                       | N.S.                      | N.S.                        |
| 13                | 13              | Butanedioic acid, 2TMS derivative           | Succinic acid, 2TMS                | 593.9               | 1323.2          | 1321                   | 2.2                      | 2               | 40309-57-7       | N.S.                       | 1.67E-02                  | 1.25E-02                    |
| 14                | 14              | Picolinic acid, TMS derivative              | Picolinic acid, TMS                | 596.9               | 1327.6          |                        |                          | 2               | 17881-49-1       | N.S.                       | N.S.                      | N.S.                        |
| 15                | 15              | Glyceric acid, 3TMS derivative              | Glyceric acid, 3TMS                | 610.7               | 1347.8          | 1344                   | 3.8                      | 2               | 38191-87-6       | N.S.                       | N.S.                      | N.S.                        |
| 16                | 16              | Uracil, 2TMS derivative                     | Uracil, 2TMS                       | 612                 | 1349.7          | 1343                   | 6.7                      | 2               | 10457-14-4       | N.S.                       | N.S.                      | N.S.                        |
| 17                | 17              | Serine, 3TMS derivative                     | Serine, 3TMS                       | 630.2               | 1376.3          | 1368                   | 8.3                      | 2               | 64625-17-8       | N.S.                       | N.S.                      | N.S.                        |
| 18                | 18              | L-Threonine, 3TMS derivative                | Threonine, 3TMS                    | 648                 | 1402.5          | 1367                   | 35.5                     | 2               | 7537-02-2        | N.S.                       | N.S.                      | N.S.                        |
| 19                | 19              | Malic acid, 3TMS derivative                 | Malic acid, 3TMS                   | 712                 | 1507.8          | 1497                   | 10.8                     | 2               | 38166-11-9       | N.S.                       | N.S.                      | N.S.                        |
| 20                | 20              | L-Aspartic acid, 3TMS derivative            | Aspartic acid, 3TMS                | 730.7               | 1538.5          | 1522                   | 16.5                     | 2               | 55268-53-6       | N.S.                       | N.S.                      | N.S.                        |
| 21                | 21              | DL-Phenylalanine, TMS derivative            | Phenylalanine, TMS                 | 738.4               | 1551.2          | 1559                   | -7.8                     | 2               | 2899-42-5        | N.S.                       | N.S.                      | N.S.                        |
| 22                | 22              | L-Glutamic acid, 3TMS derivative            | Glutamic acid, 3TMS                | 787.9               | 1636.1          | 1651                   | -14.9                    | 2               | 15985-07-6       | N.S.                       | N.S.                      | N.S.                        |
| 23                | 23              | Citric acid, 4TMS derivative                | Citric acid, 4TMS                  | 901.2               | 1847.2          | 1845                   | 2.2                      | 2               | 14330-97-3       | N.S.                       | N.S.                      | N.S.                        |
| 24                | 24              | Tyrosine, 2TMS derivative                   | Tyrosine, 2TMS                     | 925.7               | 1896.5          | 1892                   | 4.5                      | 2               | 7536-83-6        | N.S.                       | N.S.                      | N.S.                        |
| 25                | 25              | Scyllo-Inositol, 6TMS derivative            | Scyllo-Inositol, 6TMS              | 1008                | 2067.8          |                        |                          | 2               | 14251-18-4       | N.S.                       | N.S.                      | N.S.                        |
| 26                | 26              | Myo-Inositol, 6TMS derivative               | Myo-Inositol, 6TMS                 | 1035.6              | 2128.5          | 2129                   | -0.5                     | 2               | 2582-79-8        | N.S.                       | N.S.                      | N.S.                        |
| 27                | 27              | Uridine, 3TMS derivative                    | Uridine, 3TMS                      | 1178.8              | 2469.6          | 2470                   | -0.4                     | 2               | 10457-16-6       | N.S.                       | N.S.                      | N.S.                        |
| <b>Cerebellum</b> |                 |                                             |                                    |                     |                 |                        |                          |                 |                  |                            |                           |                             |
| 1                 | 28              | Lactic Acid, 2TMS derivative                | Lactic Acid, 2TMS                  | 411.8               | 1057.1          | 1066                   | -8.9                     | 2               | 17596-96-2       | N.S.                       | N.S.                      | N.S.                        |
| 2                 | 29              | Glycolic acid, 2TMS derivative              | Glycolic acid, 2TMS                | 422.2               | 1072.3          | 1081                   | -8.7                     | 2               | 33581-77-0       | N.S.                       | 1.64E-03                  | N.S.                        |
| 3                 | 30              | L-Alanine, 2TMS derivative                  | Alanine, 2TMS                      | 442.9               | 1102.5          | 1100                   | 2.5                      | 2               | 27844-07-1       | N.S.                       | N.S.                      | N.S.                        |
| 4                 | 31              | Glycine, di-TMS                             | Glycine, 2TMS                      | 455.5               | 1120.9          | 1105                   | 15.9                     | 2               | 7364-42-3        | N.S.                       | N.S.                      | N.S.                        |
| 5                 | 32              | Oxalic acid, 2TMS derivative                | Oxalic acid, 2TMS                  | 467.2               | 1138.0          | 1136                   | 2.0                      | 2               | 18294-04-7       | N.S.                       | N.S.                      | N.S.                        |
| 6                 | 33              | 2-Pyrrolidinone, TMS derivative             | 2-Pyrrolidinone, TMS               | 468.7               | 1140.2          | 1144                   | -3.8                     | 2               | 14468-90-7       | N.S.                       | N.S.                      | N.S.                        |
| 7                 | 34              | 3-Hydroxybutyric acid, 2TMS derivative      | 3-Hydroxybutyric acid, 2TMS        | 486.3               | 1165.9          | 1167                   | -1.1                     | 2               | 55133-94-3       | N.S.                       | 3.02E-03                  | N.S.                        |
| 8                 | 35              | L-Valine, 2TMS derivative                   | Valine, 2TMS                       | 527.1               | 1225.6          | 1224                   | 1.6                      | 2               | 7364-44-5        | N.S.                       | N.S.                      | N.S.                        |
| 9                 | 36              | L-Leucine, 2TMS derivative                  | Leucine, 2TMS                      | 567.4               | 1284.5          | 1276                   | 8.5                      | 2               | 7364-46-7        | N.S.                       | N.S.                      | N.S.                        |
| 10                | 37              | Butanedioic acid, 2TMS derivative           | Succinic acid, 2TMS                | 593.7               | 1322.9          | 1321                   | 1.9                      | 2               | 40309-57-7       | 1.68E-02                   | N.S.                      | N.S.                        |
| 11                | 38              | Picolinic acid, TMS derivative              | Picolinic acid, TMS                | 596.7               | 1327.3          |                        |                          | 2               | 17881-49-1       | N.S.                       | N.S.                      | N.S.                        |
| 12                | 39              | Uracil, 2TMS derivative                     | Uracil, 2TMS                       | 611.9               | 1349.5          | 1343                   | 6.5                      | 2               | 10457-14-4       | N.S.                       | N.S.                      | N.S.                        |
| 13                | 40              | Pipecolic acid, 2TMS derivative             | Pipecolic acid, 2TMS               | 626.9               | 1371.4          | 1363                   | 8.4                      | 2               | 55255-44-2       | N.S.                       | N.S.                      | N.S.                        |
| 14                | 41              | Serine, 3TMS derivative                     | Serine, 3TMS                       | 630                 | 1376.0          | 1368                   | 8.0                      | 2               | 64625-17-8       | N.S.                       | N.S.                      | 1.58E-02                    |
| 15                | 42              | L-Threonine, 3TMS derivative                | Threonine, 3TMS                    | 647.9               | 1402.4          | 1367                   | 35.4                     | 2               | 7537-02-2        | N.S.                       | N.S.                      | N.S.                        |
| 16                | 43              | Pyroglutamic acid, TMS derivative           | Pyroglutamic acid, TMS             | 708.1               | 1501.4          | 1511                   | -9.6                     | 2               |                  | N.S.                       | N.S.                      | N.S.                        |
| 17                | 44              | Malic acid, 3TMS derivative                 | Malic acid, 3TMS                   | 711.9               | 1507.6          | 1497                   | 10.6                     | 2               | 38166-11-9       | N.S.                       | N.S.                      | N.S.                        |
| 18                | 45              | L-Aspartic acid, 3TMS derivative            | Aspartic acid, 3TMS                | 730.6               | 1538.3          | 1522                   | 16.3                     | 2               | 55268-53-6       | N.S.                       | 2.46E-02                  | 1.31E-02                    |
| 19                | 46              | 4-Aminobutanoic acid, 3TMS derivative       | 4-Aminobutyric acid, bis-TMS       | 732.6               | 1541.6          | 1532                   | 9.6                      | 2               | 39508-23-1       | N.S.                       | N.S.                      | N.S.                        |
| 20                | 47              | L-Glutamic acid, 3TMS derivative            | Glutamic acid, 3TMS                | 787.8               | 1635.9          | 1651                   | -15.1                    | 2               | 15985-07-6       | N.S.                       | N.S.                      | 4.35E-02                    |
| 21                | 48              | L-Phenylalanine, 2TMS derivative            | Phenylalanine, 2TMS                | 788.6               | 1637.4          |                        |                          | 2               | 7364-51-4        | N.S.                       | N.S.                      | 1.07E-02                    |
| 22                | 49              | Citric acid, 4TMS derivative                | Citric acid, 4TMS                  | 900.9               | 1846.6          | 1845                   | 1.6                      | 2               | 14330-97-3       | N.S.                       | N.S.                      | 4.64E-02                    |
| 23                | 50              | Tyrosine, 2TMS derivative                   | Tyrosine, 2TMS                     | 925.3               | 1895.7          | 1892                   | 3.7                      | 2               | 7536-83-6        | N.S.                       | N.S.                      | N.S.                        |
| 24                | 51              | D-Mannitol, 6TMS derivative                 | Mannitol, 6TMS                     | 965.1               | 1975.7          | 1964                   | 11.7                     | 2               | 14317-07-8       | N.S.                       | N.S.                      | N.S.                        |



|               |     |                                                                            |                              |        |        |      |       |   |            |          |          |          |
|---------------|-----|----------------------------------------------------------------------------|------------------------------|--------|--------|------|-------|---|------------|----------|----------|----------|
| 25            | 52  | Myo-Inositol, 6TMS derivative                                              | Myo-Inositol, 6TMS           | 1035.3 | 2127.8 | 2129 | -1.2  | 2 | 2582-79-8  | N.S.     | N.S.     | N.S.     |
| 26            | 53  | Urea, 2TMS derivative                                                      | Urea, 2TMS                   | 544.9  | 1251.6 | 1249 | 2.6   | 2 | 18297-63-7 | N.S.     | N.S.     | N.S.     |
| 27            | 54  | Uridine, 3TMS derivative                                                   | Uridine, 3TMS                | 1178.8 | 2469.6 | 2470 | -0.4  | 2 | 10457-16-6 | N.S.     | N.S.     | N.S.     |
| <b>Kidney</b> |     |                                                                            |                              |        |        |      |       |   |            |          |          |          |
| 1             | 55  | Formamide, 2TMS derivative                                                 | Formamide, 2TMS              | 423.7  | 929.4  |      |       | 2 | 15500-60-4 | N.S.     | N.S.     | N.S.     |
| 2             | 56  | N,N-Dimethylglycine, TMS derivative                                        | N,N-Dimethylglycine, TMS     | 454.8  | 968.1  | 1001 | -32.9 | 2 |            | N.S.     | N.S.     | N.S.     |
| 3             | 57  | Glycolic acid, 2TMS derivative                                             | Glycolic acid, 2TMS          | 526.9  | 1057.6 | 1081 | -23.4 | 2 | 33581-77-0 | N.S.     | N.S.     | N.S.     |
| 4             | 58  | Propanoic acid, 2-oxo-3-(trimethylsilyl)-, trimethylsilyl ester            | Pyruvic acid, TMS derivative | 536    | 1068.9 |      |       | 2 | 55887-51-9 | N.S.     | N.S.     | N.S.     |
| 5             | 59  | Tris(trimethylsilyl)amine                                                  | Amine, 3TMS                  | 565.2  | 1110.6 |      |       | 2 | 1586-73-8  | N.S.     | N.S.     | N.S.     |
| 6             | 60  | L-Valine, 2TMS derivative                                                  | Valine, 2TMS                 | 635.3  | 1212.7 | 1224 | -11.3 | 2 | 7364-44-5  | N.S.     | N.S.     | N.S.     |
| 7             | 61  | L-Leucine, 2TMS derivative                                                 | Leucine, 2TMS                | 676.4  | 1272.3 | 1276 | -3.7  | 2 | 7364-46-7  | N.S.     | N.S.     | N.S.     |
| 8             | 62  | L-Proline, 2TMS derivative                                                 | Proline, 2TMS                | 696.8  | 1300.9 | 1305 | -4.1  | 2 | 7364-47-8  | N.S.     | N.S.     | N.S.     |
| 9             | 63  | Glycine, 3TMS derivative                                                   | Glycine, 3TMS                | 701.6  | 1307.7 | 1314 | -6.3  | 2 | 5630-82-0  | N.S.     | N.S.     | N.S.     |
| 10            | 64  | Glyceric acid, 3TMS derivative                                             | Glyceric acid, 3TMS          | 715.7  | 1327.4 | 1344 | -16.6 | 2 | 38191-87-6 | 5.50E-02 | 4.10E-03 | N.S.     |
| 11            | 65  | Uracil, 2TMS derivative                                                    | Uracil, 2TMS                 | 722.7  | 1337.2 | 1343 | -5.8  | 2 | 10457-14-4 | N.S.     | N.S.     | N.S.     |
| 12            | 66  | 2-Butenedioic acid, (E)-, 2TMS derivative                                  | Fumaric acid, 2TMS           | 731.3  | 1349.3 | 1353 | -3.7  | 2 | 17962-03-7 | N.S.     | N.S.     | N.S.     |
| 13            | 67  | Erythritol, 4TMS derivative                                                | Erythritol, 4TMS             | 831.2  | 1498.2 |      |       | 2 | 25258-02-0 | N.S.     | N.S.     | N.S.     |
| 14            | 68  | L-Aspartic acid, 3TMS derivative                                           | Aspartic acid, 3TMS          | 841.9  | 1516.5 | 1522 | -5.5  | 2 | 55268-53-6 | 8.56E-03 | N.S.     | N.S.     |
| 15            | 69  | L-5-Oxoproline, 2TMS derivative                                            | Pyroglutamic acid, 2TMS      | 845.4  | 1522.5 | 1522 | 0.5   | 2 | 30274-77-2 | N.S.     | N.S.     | N.S.     |
| 16            | 70  | L-Glutamic acid, 3TMS derivative                                           | Glutamic acid, 3TMS          | 902.4  | 1620.2 | 1651 | -30.8 | 2 | 15985-07-6 | N.S.     | N.S.     | N.S.     |
| 17            | 71  | Phenylalanine, 2TMS derivative                                             | Phenylalanine, 2TMS          | 907.5  | 1629.0 | 1636 | -7.0  | 2 | 2899-52-7  | N.S.     | N.S.     | N.S.     |
| 18            | 72  | Xylitol, 5TMS derivative                                                   | Xylitol, 5TMS                | 955.7  | 1715.7 | 1741 | -25.3 | 2 | 14199-72-5 | N.S.     | N.S.     | N.S.     |
| 19            | 73  | D-Pinitol, pentakis(trimethylsilyl) ether                                  | Pinitol, 5TMS                | 1016.4 | 1827.2 | 1815 | 12.2  | 2 |            | N.S.     | N.S.     | N.S.     |
| 20            | 74  | D-Gluconic acid, 6TMS derivative                                           | Gluconic acid, 6TMS          | 1102.7 | 1998.5 | 2043 | -44.5 | 2 | 34290-52-3 | N.S.     | N.S.     | N.S.     |
| 21            | 75  | Lactic Acid, 2TMS derivative                                               | Lactic Acid, 2TMS            | 515.7  | 1043.7 | 1066 | -22.3 | 2 | 17596-96-2 | N.S.     | N.S.     | N.S.     |
| 22            | 76  | Silanol, trimethyl-, phosphate (3:1)                                       | Phosphoric acid, TMS         | 680.8  | 1278.5 | 1286 | -7.5  | 2 | 10497-05-9 | N.S.     | N.S.     | N.S.     |
| 23            | 77  | L-Isoleucine, 2TMS derivative                                              | Isoleucine, 2TMS             | 692.5  | 1294.9 | 1301 | -6.1  | 2 | 7483-92-3  | N.S.     | N.S.     | N.S.     |
| 24            | 78  | L-Threonine, 3TMS derivative                                               | Threonine, 3TMS              | 754.1  | 1381.3 | 1367 | 14.3  | 2 | 7537-02-2  | N.S.     | N.S.     | N.S.     |
| 25            | 79  | Malic acid, 3TMS derivative                                                | Malic acid, 3TMS             | 820.2  | 1479.3 | 1497 | -17.7 | 2 | 38166-11-9 | N.S.     | N.S.     | N.S.     |
| 26            | 80  | D-Glucose, 5TMS derivative                                                 | Glucose, 5TMS                | 1050   | 1892.6 | 1926 | -33.4 | 2 | 6736-97-6  | N.S.     | N.S.     | N.S.     |
| 27            | 81  | Scyllo-Inositol, 6TMS derivative                                           | Scyllo-Inositol, 6TMS        | 1115.9 | 2025.1 |      |       | 2 | 14251-18-4 | N.S.     | N.S.     | N.S.     |
| 28            | 82  | Myo-Inositol, 6TMS derivative                                              | Myo-Inositol, 6TMS           | 1149.3 | 2095.4 | 2129 | -33.6 | 2 | 2582-79-8  | N.S.     | N.S.     | N.S.     |
| 29            | 83  | 2,3,4-Trihydroxybutyric acid tetrakis(trimethylsilyl) deriv., (, (R*,R*-)) | Threonic acid, 4TMS          | 853.1  | 1535.7 |      |       | 2 | 38191-88-7 | N.S.     | N.S.     | N.S.     |
| 30            | 84  | Ribitol, 5TMS derivative                                                   | Ribitol, 5TMS                | 948.2  | 1701.9 | 1747 | -45.1 | 2 | 32381-53-6 | N.S.     | N.S.     | N.S.     |
| <b>Liver</b>  |     |                                                                            |                              |        |        |      |       |   |            |          |          |          |
| 1             | 85  | 3-Methylbutanoic acid, TMS derivative                                      | Isovaleric acid TMS          | 413.9  | 933.5  | 932  | 1.5   | 2 | 55557-13-6 | 4.22E-02 | N.S.     | N.S.     |
| 2             | 86  | Ethanolamine, 2TMS derivative                                              | Ethanolamine, 2TMS           | 491.4  | 1029.5 | 1021 | 8.5   | 2 | 17165-52-5 | N.S.     | N.S.     | N.S.     |
| 3             | 87  | Lactic Acid, 2TMS derivative                                               | Lactic Acid, 2TMS            | 514.5  | 1058.2 | 1066 | -7.8  | 2 | 17596-96-2 | 4.55E-02 | N.S.     | 1.88E-02 |
| 4             | 88  | Glycolic acid, 2TMS derivative                                             | Glycolic acid, 2TMS          | 527.2  | 1073.9 | 1081 | -7.1  | 2 | 33581-77-0 | N.S.     | N.S.     | N.S.     |
| 5             | 89  | L-Alanine, 2TMS derivative                                                 | Alanine, 2TMS                | 549.1  | 1101   | 1100 | 1     | 2 | 27844-07-1 | N.S.     | N.S.     | N.S.     |
| 6             | 90  | Glycine, di-TMS                                                            | Glycine, 2TMS                | 564.2  | 1119.7 | 1105 | 14.7  | 2 | 7364-42-3  | N.S.     | N.S.     | N.S.     |
| 7             | 91  | Oxalic acid, 2TMS derivative                                               | Oxalic acid, 2TMS            | 571.1  | 1128.3 | 1136 | -7.7  | 2 | 18294-04-7 | N.S.     | N.S.     | N.S.     |
| 8             | 92  | 3-Hydroxybutyric acid, 2TMS derivative                                     | 3-Hydroxybutyric acid, 2TMS  | 593.1  | 1155.5 | 1167 | -11.5 | 2 | 55133-94-3 | N.S.     | N.S.     | 2.01E-02 |
| 9             | 93  | 2-Aminobutanoic acid, 2TMS derivative                                      | 2-Aminobutyric acid, 2TMS    | 602.4  | 1167.1 | 1188 | -20.9 | 2 | 55133-91-0 | 5.60E-03 | N.S.     | N.S.     |
| 10            | 94  | Propanedioic acid, 2TMS derivative                                         | Malonic acid, 2TMS           | 626.1  | 1196.4 | 1216 | -19.6 | 2 | 18457-04-0 | N.S.     | N.S.     | N.S.     |
| 11            | 95  | L-Valine, 2TMS derivative                                                  | Valine, 2TMS                 | 635.2  | 1208.8 | 1224 | -15.2 | 2 | 7364-44-5  | N.S.     | N.S.     | 1.75E-02 |
| 12            | 96  | Urea, 2TMS derivative                                                      | Urea, 2TMS                   | 656.9  | 1239.6 | 1249 | -9.4  | 2 | 18297-63-7 | N.S.     | N.S.     | N.S.     |
| 13            | 97  | Benzoic Acid, TMS derivative                                               | Benzoic acid, TMS            | 661.6  | 1246.2 | 1249 | -2.8  | 3 | 2078-12-8  | N.S.     | N.S.     | N.S.     |
| 14            | 98  | Silanol, trimethyl-, phosphate (3:1)                                       | Phosphoric acid, 3TMS        | 675.7  | 1266.2 | 1286 | -19.8 | 2 | 10497-05-9 | N.S.     | N.S.     | N.S.     |
| 15            | 99  | L-Isoleucine, 2TMS derivative                                              | Isoleucine, 2TMS             | 691.3  | 1288.4 | 1301 | -12.6 | 2 | 7483-92-3  | N.S.     | N.S.     | N.S.     |
| 16            | 100 | L-Proline, 2TMS derivative                                                 | Proline, 2TMS                | 695.8  | 1294.7 | 1305 | -10.3 | 2 | 7364-47-8  | N.S.     | N.S.     | N.S.     |
| 17            | 101 | Butanedioic acid, 2TMS derivative                                          | Succinic acid, 2TMS          | 706.2  | 1309.5 | 1321 | -11.5 | 2 | 40309-57-7 | N.S.     | N.S.     | N.S.     |
| 18            | 102 | Glyceric acid, 3TMS derivative                                             | Glyceric acid, 3TMS          | 715.5  | 1322.7 | 1344 | -21.3 | 2 | 38191-87-6 | N.S.     | N.S.     | N.S.     |
| 19            | 103 | Uracil, 2TMS derivative                                                    | Uracil, 2TMS                 | 722.5  | 1332.6 | 1343 | -10.4 | 2 | 10457-14-4 | 9.68E-03 | N.S.     | N.S.     |
| 20            | 104 | 2-Butenedioic acid, (E)-, 2TMS derivative                                  | Fumaric acid, 2TMS           | 731.3  | 1345.1 | 1353 | -7.9  | 2 | 17962-03-7 | N.S.     | N.S.     | N.S.     |
| 21            | 105 | L-Serine, 3TMS derivative                                                  | Serine, 3TMS                 | 736.7  | 1352.7 | 1388 | -35.3 | 2 | 7364-48-9  | N.S.     | N.S.     | N.S.     |
| 22            | 106 | L-Threonine, 3TMS derivative                                               | Threonine, 3TMS              | 753.7  | 1376.8 | 1367 | 9.8   | 2 | 7537-02-2  | N.S.     | N.S.     | N.S.     |

|               |     |                                                       |                             |        |        |      |       |   |            |            |          |      |
|---------------|-----|-------------------------------------------------------|-----------------------------|--------|--------|------|-------|---|------------|------------|----------|------|
| 23            | 107 | L-Aspartic acid, 3TMS derivative                      | Aspartic acid, 3TMS         | 840.5  | 1512.4 | 1522 | -9.6  | 2 | 55268-53-6 | N.S.       | N.S.     | N.S. |
| 24            | 108 | L-5-Oxoproline, 2TMS derivative                       | Pyroglutamic acid, 2TMS     | 843.2  | 1516.7 | 1522 | -5.3  | 2 | 30274-77-2 | N.S.       | N.S.     | N.S. |
| 25            | 109 | L-Glutamic acid, 3TMS derivative                      | Glutamic acid, 3TMS         | 900.9  | 1609.8 | 1651 | -41.2 | 2 | 15985-07-6 | N.S.       | N.S.     | N.S. |
| 26            | 110 | Phenylalanine, 2TMS derivative                        | Phenylalanine, 2TMS         | 907    | 1620.7 | 1636 | -15.3 | 2 | 2899-52-7  | N.S.       | N.S.     | N.S. |
| 27            | 111 | L-Lysine, 3TMS derivative                             | Lysine, 3TMS                | 951.3  | 1699.4 | 1718 | -18.6 | 2 | 24595-69-5 | N.S.       | N.S.     | N.S. |
| 28            | 112 | Ribitol, 5TMS derivative                              | Ribitol, 5TMS               | 959.2  | 1713.5 | 1747 | -33.5 | 2 | 32381-53-6 | N.S.       | 2.98E-03 | N.S. |
| 29            | 113 | L-Glutamine, 3TMS derivative                          | Glutamine, 3TMS             | 987.6  | 1764   | 1768 | -4    | 2 | 70591-28-5 | N.S.       | N.S.     | N.S. |
| 30            | 114 | 9H-Purin-6-ol, 2TMS derivative                        | Hypoxanthine, bis-TMS       | 1007   | 1798.5 | 1811 | -12.5 | 2 | 17962-89-9 | 5.1675E-02 | N.S.     | N.S. |
| 31            | 115 | D-Fructose, 5TMS derivative                           | Fructose, 5TMS              | 1010   | 1804.2 | 1842 | -37.8 | 2 | 19126-98-8 | N.S.       | N.S.     | N.S. |
| 32            | 116 | Adenine, 2TMS derivative                              | Adenine, 2TMS               | 1039.7 | 1862.5 | 1880 | -17.5 | 2 | 17995-04-9 | N.S.       | N.S.     | N.S. |
| 33            | 117 | Methyl galactoside (1S,2R,3S,4R,5R)-, 4TMS derivative | Methyl galactoside, 4TMS    | 1042.6 | 1868.2 |      |       | 2 | 2641-79-4  | 3.24E-03   | N.S.     | N.S. |
| 34            | 118 | D-Glucitol, 6TMS derivative                           | Sorbitol, 6TMS              | 1071.4 | 1924.7 | 1979 | -54.3 | 2 | 14199-80-5 | 2.97E-05   | 4.35E-04 | N.S. |
| 35            | 119 | L-Tyrosine, 3TMS derivative                           | Tyrosine, 3TMS              | 1074.5 | 1930.8 | 1959 | -28.2 | 2 | 51220-73-6 | N.S.       | N.S.     | N.S. |
| 36            | 120 | Ascorbic acid, 4TMS derivative                        | Ascorbic acid, 4TMS         | 1077   | 1935.7 | 1971 | -35.3 | 2 | 55517-56-1 | N.S.       | N.S.     | N.S. |
| 37            | 121 | D-Gluconic acid, 6TMS derivative                      | Gluconic acid, 6TMS         | 1085.8 | 1953   | 1997 | -44   | 2 | 34290-52-3 | N.S.       | N.S.     | N.S. |
| 38            | 122 | Myo-Inositol, 6TMS derivative                         | Myo-Inositol, 6TMS          | 1147.2 | 2080.5 | 2129 | -48.5 | 2 | 2582-79-8  | 1.29E-02   | N.S.     | N.S. |
| 39            | 123 | L-Tryptophan, 3TMS derivative                         | Tryptophan, 3TMS            | 1205.2 | 2205.7 | 2225 | -19.3 | 2 | 55429-28-2 | N.S.       | N.S.     | N.S. |
| 40            | 124 | D-Glucose, 5TMS derivative                            | Glucose, 5TMS               | 1091.1 | 1963.4 | 1926 | 37.4  | 2 | 6736-97-6  | N.S.       | N.S.     | N.S. |
| 41            | 125 | 2-Hydroxybutyric acid, 2TMS derivative                | 2-Hydroxybutyric acid, 2TMS | 567.7  | 1124.1 | 1136 | -11.9 | 2 | 55133-93-2 | N.S.       | N.S.     | N.S. |
| 42            | 126 | Malic acid, 3TMS derivative                           | Malic acid, 3TMS            | 820.1  | 1479.9 | 1497 | -17.1 | 2 | 38166-11-9 | N.S.       | N.S.     | N.S. |
| <b>Spleen</b> |     |                                                       |                             |        |        |      |       |   |            |            |          |      |
| 1             | 127 | Disilathiane, hexamethyl-                             | Sulfide, 2TMS               | 429.6  | 953.0  | 978  | -25.0 | 2 | 3385-94-2  | N.S.       | N.S.     | N.S. |
| 2             | 128 | L-Alanine, 2TMS derivative                            | Alanine, 2TMS               | 548.1  | 1099.8 | 1100 | -0.2  | 2 | 27844-07-1 | N.S.       | N.S.     | N.S. |
| 3             | 129 | L-Valine, 2TMS derivative                             | Valine, 2TMS                | 634.3  | 1207.5 | 1224 | -16.5 | 2 | 7364-44-5  | N.S.       | 3.32E-03 | N.S. |
| 4             | 130 | Benzoic Acid, TMS derivative                          | Benzoic acid, TMS           | 661.2  | 1245.7 | 1249 | -3.3  | 2 | 2078-12-8  | N.S.       | N.S.     | N.S. |
| 5             | 131 | Silanol, trimethyl-, phosphate (3:1)                  | Phosphoric acid, TMS        | 674.4  | 1264.4 | 1286 | -21.6 | 2 | 10497-05-9 | N.S.       | 1.42E-02 | N.S. |
| 6             | 132 | L-Leucine, 2TMS derivative                            | Leucine, 2TMS               | 675.1  | 1265.4 | 1276 | -10.6 | 2 | 7364-46-7  | N.S.       | 8.79E-03 | N.S. |
| 7             | 133 | L-Isoleucine, 2TMS derivative                         | Isoleucine, 2TMS            | 690.4  | 1287.1 | 1301 | -13.9 | 2 | 7483-92-3  | N.S.       | 2.04E-03 | N.S. |
| 8             | 134 | L-Proline, 2TMS derivative                            | Proline, 2TMS derivative    | 694.8  | 1293.3 | 1305 | -11.7 | 2 | 7364-47-8  | N.S.       | N.S.     | N.S. |
| 9             | 135 | Glycine, 3TMS derivative                              | Glycine, 3TMS               | 700.3  | 1301.1 | 1314 | -12.9 | 2 | 5630-82-0  | N.S.       | N.S.     | N.S. |
| 10            | 136 | Ethanamine, 2TMS derivative                           | Ethylamine, 2TMS            | 702.9  | 1304.8 |      |       | 2 | 2477-39-6  | N.S.       | N.S.     | N.S. |
| 11            | 137 | 2-Butenedioic acid, (E)-, 2TMS derivative             | Fumaric acid, 2TMS          | 730.5  | 1343.9 | 1353 | -9.1  | 2 | 17962-03-7 | N.S.       | 5.25E-02 | N.S. |
| 12            | 138 | Malic acid, 3TMS derivative                           | Malic acid, 3TMS            | 818.9  | 1478.0 | 1497 | -19.0 | 2 | 38166-11-9 | N.S.       | 5.03E-02 | N.S. |
| 13            | 139 | L-Aspartic acid, 3TMS derivative                      | Aspartic acid, 3TMS         | 839.4  | 1510.7 | 1522 | -11.3 | 2 | 55268-53-6 | N.S.       | N.S.     | N.S. |
| 14            | 140 | L-Glutamic acid, 3TMS derivative                      | Glutamic acid, 3TMS         | 899.6  | 1607.5 | 1651 | -43.5 | 2 | 15985-07-6 | N.S.       | N.S.     | N.S. |
| 15            | 141 | Phenylalanine, 2TMS derivative                        | Phenylalanine, 2TMS         | 905.9  | 1618.7 | 1636 | -17.3 | 2 | 2899-52-7  | N.S.       | N.S.     | N.S. |
| 16            | 142 | Taurine, 3TMS derivative                              | Taurine, 3TMS               | 928.9  | 1659.6 |      |       | 2 |            | N.S.       | N.S.     | N.S. |
| 17            | 143 | 9H-Purin-6-ol, 2TMS derivative                        | Hypoxanthine, bis-TMS       | 1006.2 | 1797.0 | 1811 | -14.0 | 2 | 17962-89-9 | N.S.       | N.S.     | N.S. |
| 18            | 144 | Tyrosine, 2TMS derivative                             | Tyrosine, 2TMS              | 1048.7 | 1880.2 | 1892 | -11.8 | 2 | 7536-83-6  | N.S.       | N.S.     | N.S. |
| 19            | 145 | Ascorbic acid, 4TMS derivative                        | Ascorbic acid, 4TMS         | 1075.8 | 1933.4 | 1971 | -37.6 | 2 | 55517-56-1 | 1.78E-02   | N.S.     | N.S. |
| 20            | 146 | Myo-Inositol, 6TMS derivative                         | Myo-Inositol, 6TMS          | 1145.9 | 2077.7 | 2129 | -51.3 | 2 | 2582-79-8  | N.S.       | 2.89E-02 | N.S. |
| 21            | 147 | Lactic Acid, 2TMS derivative                          | Lactic Acid, 2TMS           | 513.3  | 1056.7 | 1066 | -9.3  | 2 | 17596-96-2 | N.S.       | N.S.     | N.S. |
| 22            | 148 | Tris(trimethylsilyl)amine                             | Amine, 3TMS                 | 564.7  | 1120.4 |      |       | 2 | 1586-73-8  | N.S.       | N.S.     | N.S. |
| 23            | 149 | Urea, 2TMS derivative                                 | Urea, 2TMS                  | 654.7  | 1236.5 | 1249 | -12.5 | 2 | 18297-63-7 | N.S.       | N.S.     | N.S. |
| 24            | 150 | Uracil, 2TMS derivative                               | Uracil, 2TMS                | 721.7  | 1331.4 | 1343 | -11.6 | 2 | 10457-14-4 | N.S.       | N.S.     | N.S. |
| 25            | 151 | L-Threonine, 3TMS derivative                          | Threonine, 3TMS             | 752.9  | 1375.7 | 1367 | 8.7   | 2 | 7537-02-2  | N.S.       | N.S.     | N.S. |
| 26            | 152 | L-Methionine, TMS derivative                          | Methionine, TMS             | 775.5  | 1408.7 | 1416 | -7.3  | 2 |            | N.S.       | N.S.     | N.S. |
| 27            | 153 | L-5-Oxoproline, 2TMS derivative                       | Pyroglutamic acid, 2TMS     | 842.4  | 1515.5 | 1522 | -6.5  | 2 | 30274-77-2 | N.S.       | N.S.     | N.S. |

<sup>a</sup>Full names of metabolites are directly extracted from the NIST11 metabolite database. <sup>b</sup>Metabolite short names are IUPAC or generic names of the identified metabolites. <sup>c</sup>Retention times of deconvoluted peaks were calculated as a mean of RTs of each peak across all samples. <sup>d</sup>Based on these RTs, retention indices (RI) of metabolites were estimated using all even alkane mixture sample (C10-C40). <sup>e</sup>Reported RIs of identified metabolites were extracted from NIST 11 version 2.3. <sup>f</sup>Difference between the reported RI and the calculated RI. <sup>g</sup>Identification level of the metabolites. Level 2 when the peaks are identified based on their EI-MS  $\geq 80$  (%) and RI match ( $\pm 50$ ). <sup>h</sup>CAS number of identified metabolites. For the metabolites with no CAS number the PubChem CID number has been reported followed by a (\*). <sup>i</sup>One-way ANOVA test were performed to see if there are some variables significantly different among the groups: Untreated, Gadodiamide treated, and Gadoteridol treated. Significance of effects within the different pairs of groups is evaluated by *P*-values. "N.S." = Not Significant (*P*>0.05).

**Table S4.** List of non-polar and polar compounds detected in plasma by using both NOESY and CPMG <sup>1</sup>H-NMR experiments. Short name and *p*-value from one-way ANOVA are indicated for each compound. ANOVA was performed on the three analyzed class.

| ID # | Metabolite full name  | One-way ANOVA <sup>i</sup> |                         |                           |
|------|-----------------------|----------------------------|-------------------------|---------------------------|
|      |                       | Untreated - Gadodiamide    | Untreated - Gadoteridol | Gadodiamide - Gadoteridol |
| 1    | Lipid 1               | 1.04E-06                   | 3.66E-06                | N.S.                      |
| 2    | Lipid 2               | 1.07E-05                   | 1.76E-04                | N.S.                      |
| 3    | Glyceril lipid 1      | 8.21E-06                   | 1.61E-05                | N.S.                      |
| 4    | Glyceril lipid 2      | 1.41E-04                   | 8.30E-05                | N.S.                      |
| 5    | Glycerophosphocholine | 5.72E-05                   | 2.36E-04                | N.S.                      |
| 6    | Phosphocholine 1      | N.S.                       | N.S.                    | N.S.                      |
| 7    | Phosphocholine 2      | N.S.                       | N.S.                    | N.S.                      |
| 8    | Phosphocholine 3      | N.S.                       | N.S.                    | N.S.                      |
| 9    | Lipid 3               | N.S.                       | N.S.                    | N.S.                      |
| 10   | Lipid 4               | N.S.                       | N.S.                    | N.S.                      |
| 11   | Lipid 5               | N.S.                       | N.S.                    | N.S.                      |
| 12   | Lipid 6               | 2.76E-04                   | 3.92E-04                | N.S.                      |
| 13   | Lipid 7               | 2.81E-04                   | N.S.                    | N.S.                      |
| 14   | Lipid 8               | 1.15E-05                   | 2.08E-05                | N.S.                      |
| 15   | VLDL_1                | 6.59E-06                   | 2.08E-05                | N.S.                      |
| 16   | LDL_1                 | 1.15E-05                   | 3.45E-06                | N.S.                      |
| 17   | LDL_2                 | 6.94E-06                   | 1.69E-04                | N.S.                      |
| 18   | VLDL_2                | N.S.                       | N.S.                    | N.S.                      |
| 19   | Cholesterol           | N.S.                       | N.S.                    | N.S.                      |
| 20   | Formate               | N.S.                       | N.S.                    | N.S.                      |
| 21   | Tryptophan            | N.S.                       | N.S.                    | N.S.                      |
| 22   | Phenylalanine         | N.S.                       | N.S.                    | N.S.                      |
| 23   | Histidine             | N.S.                       | N.S.                    | N.S.                      |
| 24   | Tyrosine              | N.S.                       | N.S.                    | N.S.                      |
| 25   | Fumarate              | N.S.                       | N.S.                    | N.S.                      |
| 26   | Glucose               | N.S.                       | N.S.                    | N.S.                      |
| 27   | Lactate               | N.S.                       | N.S.                    | N.S.                      |
| 28   | Creatine              | N.S.                       | N.S.                    | N.S.                      |
| 29   | N,N-dimethylglycine   | N.S.                       | 4.27E-04                | N.S.                      |
| 30   | Citrate               | N.S.                       | N.S.                    | N.S.                      |
| 31   | Glutamine             | N.S.                       | N.S.                    | N.S.                      |
| 32   | Succinate             | N.S.                       | N.S.                    | N.S.                      |
| 33   | Pyruvate              | N.S.                       | N.S.                    | N.S.                      |
| 34   | Acetate               | N.S.                       | N.S.                    | N.S.                      |
| 35   | Alanine               | N.S.                       | N.S.                    | N.S.                      |
| 36   | Isoleucine            | N.S.                       | N.S.                    | N.S.                      |
| 37   | Valine                | N.S.                       | N.S.                    | N.S.                      |
| 38   | Leucine               | N.S.                       | N.S.                    | N.S.                      |
